# Supplementary material
Source: Research Square preprint supplement (doi:10.21203/rs.3.rs-8934675/v1)
Supplement: Supplementary file 1 [file 1538fb2a075fb9e8ea0ccf83.docx]

**Can ground state proton transfer prevent *cis-trans* isomerization in 2,4-dihydroxy azobenzene derivatives? A theoretical aspect in background of experimental observation**

**Dhiraj Das*a and Jagannath Kuchlyanb**

aBasic Sciences & Humanities (BS&H), Indian Naval Academy (INA), Ezhimala, Kannur-670310, Kerala, India**.**

bDepartment of Chemistry, National Institute of Technology (NIT) Hamirpur, Hamirpur-177005, H.P., India

**Content Page number**

**DFT Calculated bond length and angles 2**

**TD-DFT calculated transitions and values 2-4**

**Optimized coordinate of the compounds 4-10**

**Table S1** DFT calculated bond length and bond angles around azo- group

| **ID** | **Trans-** | | | **Cis-** | | | **TS** | | |
| --- | --- | --- | --- | --- | --- | --- | --- | --- | --- |
|  | **R**  **(N=N) (Å)** | **A**  **(N=N-C) (⁰)** | **D**  **(C-N=N-C) (⁰)** | **R (N=N) (Å)** | **A**  **(N=N-C) (⁰)** | **D**  **(C-N=N-C) (⁰)** | **R**  **(N=N) (Å)** | **A**  **(N=N-C) (⁰)** | **D**  **(C-N=N-C) (⁰)** |
| **ABOHCl** | 1.26 | 116.74 | -177.29 | 1.25 | 128.63 | -8.9 | 1.23 | 119.75 | -85.85 |
| **ABOHCN** | 1.27 | 116.5 | 179.99 | 1.26 | 129.1 | 4.4 | 1.23 | 120.2 | -74.2 |
| **ABOHNO2** | 1.26 | 116.9 | -175.5 | 1.25 | 127.9 | -11.4 | 1.23 | 120.3 | -88.35 |

**Table S2** TD-DFT calculated transition values.

| **ID** | ***Trans*-** | | | | ***Cis*-** | | | |  |
| --- | --- | --- | --- | --- | --- | --- | --- | --- | --- |
| **ABOHCl** | ***λ*cal (nm)** | ***f*** | ***E* (eV)** | **Major Contribution (%)** | ***λ*cal (nm)** | ***f*** | ***E* (eV)** | **Major Contribution (%)** | **Transition type** |
| 462.97 | **0.070** | 2.68 | H->L (18.3%)  H-1->L (75.6%)  H-2->L (3.3%) | 462.65 | **0.0604** | 2.68 | H->L (77.9%)  H-1->L (15.2%)  H-3->L (3.8%)  H-4->L (2.3%) | nπ* mixed with ππ* |
| 401.98 | 0.7357 | 3.08 | H-1-> L (18.2%)  H->L (79.2%) | 348.13 | 0.21065 | 3.56 | H-2->L (10.5%)  H-1->L (71.8%)  H->L (12.7%) | ππ* |
| 348.16 | 0.0934 | 3.56 | H-2->L (93.2)  H-1->L (2.3%) | 317.23 | 0.1978 | 3.91 | H-4->L (29.2)  H-3->L (15.9%)  H-2->L (44.3%)  H->L (7.3%) | ππ* |
| 250.38 | 0.0804 | 4.95 | H-4->L (2.2%)  H-2->L+3 (4.9%)  H-2->L+8 (2.0%)  H->L+2 (83.7%) | 252.18 | 0.0852 | 4.92 | H-1->L+1 (3.8%)  H->L+2 (83.5%) | ππ* |
| **ABOHCN** | 466.07 | **0.00** | 2.66 | H-1->L (99.1%) | 450.62 | **0.0286** | 2.75 | H-4->L (2.9%)  H-1->L (28.9%)  H->L (66.3%) | nπ* |
| 417.72 | 0.8192 | 2.97 | H-2->L (2.4%)  H->L (97.3%) | 351.23 | 0.2314 | 3.49 | H-2->L (13.0%)  H-1->L (57.5%)  H->L (22.2%)  H->L+1 (4.3%) | ππ* |
| 361.19 | 0.1232 | 3.43 | H-2->L (96.0%)  H->L (2.6%) | 309.27 | 0.1418 | 4.0 | H-4->L (21.4%)  H-3->L (19.0%)  H-2->L (23.2%)  H-1->L (2.2%)  H->L (7.5%)  H->L+1 (24.3%) | ππ* |
| 248.9 | 0.0604 | 5.04 | H-4->L (2.2%)  H-2->L+1 (34.5%)  H-2->L+3 (4.1%)  H->L+2 (54.1%) | 257.72 | 0.0612 | 4.81 | H-4->L+1 (5.8%)  H-3->L+1 (3.2%)  H-1->L+2 (2.7%)  H->L+2 (79.7%) | ππ* |
| **ABOHNO2** | 463.48 | **0.1478** | 2.68 | H-2->L (2.7%)  H-1->L (43.8%)  H-1->L+1 (11.0%)  H->L (38.6%) | 467.12 | **0.0908** | 2.65 | H-1->L (3.3%)  H-1->L+1 (4.8%)  H->L (76.9%)  H->L+1 (12.6%) | nπ* mixed with ππ* |
| 436.23 | 0.1057 | 2.84 | H-1->L (23.5%)  H-1->L+1 (6.9%)  H->L (55.0%)  H->L+1 (12.2%) | 429.67 | 0.0104 | 2.89 | H-2->L+1 (2.2%)  H-1->L (4.2%)  H-1->L+1 (19.4%)  H->L (22.1%)  H->L+1 (49.4%) | ππ* |
| 373.84 | 0.2246 | 3.32 | H-2->L (13.0%)  H-1->L+1 (42.1%)  H->L+1 (37.7%) | 338.31 | 0.1399 | 3.66 | H-5->L (2.4%)  H-2->L (50.0%)  H-2->L+1 (4.8%)  H-1->L+1 (26.3%)  H->L+1 (12.8%) | ππ* |
| 318.64 | 0.0553 | 3.89 | H-2->L (4.3%)  H-2->L+1 (87.7%)  H-1->L+1 (2.6%) | 310.51 | 0.2143 | 3.99 | H-3->L (13.3%)  H-3->L+1 (5.5%)  H-2->L+1 (65.4%)  H->L+1 (8.7%) | ππ* |

Trans - ABOHCl

26

Coordinates

N 0.65771110 0.24743795 -0.12800106

N -0.24727099 -0.61836310 0.04550695

C 1.97669718 -0.25170511 -0.11443106

C 3.03003528 0.66821694 0.06245595

C 2.30497619 -1.60523722 -0.32430108

C 4.36034138 0.24672489 0.05179795

C 3.62898028 -2.02763827 -0.34059108

C 4.66070937 -1.10059722 -0.14943107

H 5.14905045 0.97588293 0.20060296

H 3.86046828 -3.07447736 -0.51228809

H 5.69775347 -1.42168626 -0.16446607

C -1.56538908 -0.16986204 -0.02000006

C -2.53801518 -1.16500610 0.24801796

C -1.98932109 1.14068407 -0.32509108

C -3.89872727 -0.85520505 0.20528196

C -3.33437819 1.45465412 -0.36736008

H -1.23329802 1.89134411 -0.52643609

C -4.28777228 0.44927706 -0.10123906

H -4.62625034 -1.63399810 0.41441098

H -3.67883920 2.45541920 -0.60267610

O -2.16689117 -2.42901420 0.55225199

H -1.19107109 -2.44259022 0.54095799

H 1.49615511 -2.30728426 -0.49094309

Cl 2.69686929 2.36778308 0.32922897

O -5.59717735 0.82023711 -0.16012107

H -6.17009845 0.06593406 0.03370095

Cis - ABOHCl

26

Coordinates

N -0.93583509 -1.48960497 0.74614713

N 0.31328800 -1.56395701 0.64844013

C -1.67074612 -0.27118987 0.60815812

C -2.64698920 -0.13931783 -0.38939195

C -1.59143610 0.71252821 1.60813820

C -3.49887024 0.96599727 -0.41814595

C -2.44763414 1.81097431 1.59046420

C -3.40048421 1.94233734 0.57458912

H -4.23322529 1.05002030 -1.21210602

H -2.37434412 2.56156936 2.37152926

H -4.07034524 2.79619742 0.55569012

C 1.22158209 -0.57536896 0.23052910

C 2.56555218 -0.97735501 0.47825711

C 1.00267810 0.63058914 -0.47443396

C 3.63897428 -0.17375498 0.08962009

C 2.06436520 1.41849018 -0.88143699

H -0.00297597 0.94133519 -0.72125198

C 3.38271029 1.01942512 -0.58438097

H 4.65088735 -0.50352603 0.30576110

H 1.90461920 2.33893025 -1.43136003

O 2.82221817 -2.14383311 1.10023616

H 1.95139210 -2.57701612 1.22664917

H -0.85650404 0.59621218 2.39872226

Cl -2.77542024 -1.36107093 -1.64181805

O 4.37901239 1.84931016 -0.99751900

H 5.24241244 1.48547111 -0.75837198

TS-ABOHCl

26

Coordinates

N -0.77483913 0.85326316 0.27890010

N 0.36284795 1.22144919 0.56752412

C -1.98509023 0.53891814 -0.17197594

C -2.77316129 -0.46539094 0.45574011

C -2.54962327 1.21108619 -1.29513402

C -4.04708139 -0.77309897 -0.00326992

C -3.81796537 0.87050016 -1.74944006

C -4.58306943 -0.11423191 -1.11375501

H -4.61356643 -1.54061102 0.51428012

H -4.21707540 1.39568520 -2.61272912

H -5.57607551 -0.36556293 -1.46949604

C 1.47560803 0.47667413 0.11823709

C 2.72180313 0.99890617 0.53818212

C 1.43465003 -0.68393396 -0.67695398

C 3.90764322 0.36783512 0.15500309

C 2.60330412 -1.31271500 -1.05922900

H 0.46914096 -1.07792099 -0.97837100

C 3.84105821 -0.77857997 -0.63807997

H 4.85690929 0.77992215 0.48428311

H 2.59802112 -2.20832508 -1.66995105

O 2.79133414 2.10487825 1.30781418

H 1.87573707 2.39935027 1.47640419

H -1.96687923 1.98387025 -1.78417806

Cl -2.09626624 -1.30550901 1.84505922

O 4.95546330 -1.44245702 -1.04548000

H 5.75141834 -1.01092598 -0.70583898

Trans-ABOHCN

27

Coordinates

N 0.75045006 0.26096202 0.00008400

N -0.15025601 -0.62882205 -0.00002500

C 2.07807616 -0.21113102 0.00020000

C 3.08103224 0.78811906 -0.00016900

C 2.46465119 -1.56211312 0.00070200

C 4.43887134 0.42639603 -0.00024300

C 3.81146229 -1.90890514 0.00064900

C 4.80265337 -0.91735907 0.00012000

H 5.19386440 1.20523509 -0.00056100

H 4.09565432 -2.95715422 0.00102000

H 5.85235143 -1.19313409 0.00006200

C -1.46569911 -0.17978401 0.00003700

C -2.44323619 -1.20771309 -0.00041800

C -1.88577114 1.16941409 0.00059800

C -3.80282929 -0.89210107 -0.00036800

C -3.22887125 1.48733211 0.00062400

H -1.12806709 1.94502615 0.00095300

C -4.18663932 0.44952203 0.00015800

H -4.53343235 -1.69554913 -0.00071200

H -3.57052427 2.51624719 0.00102300

O -2.07833416 -2.50879519 -0.00101100

H -1.10317209 -2.52544719 -0.00100900

H 1.69690113 -2.32612818 0.00120100

O -5.49274242 0.82926806 0.00035200

H -6.07131646 0.05444300 -0.00045400

C 2.72822421 2.17944016 -0.00049100

N 2.51192019 3.32299925 -0.00072500

Cis - ABOHCN

27

Coordinates

N 1.05144708 -1.53673112 -0.97639308

N -0.20077302 -1.52973812 -0.87661007

C 1.90097115 -0.45668903 -0.59722805

C 2.26856218 -0.25758202 0.75417906

C 2.54947119 0.27863202 -1.59824912

C 3.24172925 0.70589906 1.07729008

C 3.50119327 1.23995410 -1.26220209

C 3.84988229 1.45803311 0.07617701

H 3.51175327 0.84877006 2.11848216

H 3.98151930 1.81379714 -2.04917216

H 4.59908435 2.19891217 0.33504003

C -1.04914608 -0.49241304 -0.47303204

C -2.39608518 -0.95182707 -0.36542403

C -0.78953506 0.88012307 -0.23950302

C -3.42571726 -0.07939301 -0.00835100

C -1.80947914 1.74800613 0.10072701

H 0.21281402 1.27132510 -0.33988303

C -3.12740324 1.26145210 0.22568902

H -4.43753734 -0.46442504 0.07611201

H -1.61938212 2.80060422 0.27659802

O -2.69715621 -2.23924617 -0.60366105

H -1.85314614 -2.67257020 -0.85215306

H 2.29265618 0.08714001 -2.63524320

O -4.07807131 2.16735316 0.57571504

H -4.94401738 1.74170014 0.64140905

C 1.65969412 -1.02458208 1.80084514

N 1.17979009 -1.63464512 2.66827020

TS-ABOHCN

27

Coordinates

N -0.86185913 0.43013494 -0.75877706

N 0.27187096 0.82550697 -1.02069308

C -2.07165422 -0.03384009 -0.50525604

C -2.82942128 0.43760994 0.62163305

C -2.67360327 -1.00611417 -1.36204110

C -4.12902538 -0.05537609 0.84071607

C -3.95156537 -1.46705320 -1.09755808

C -4.69856642 -1.00087116 -0.00039600

H -4.67802742 0.32580094 1.69620213

H -4.38213440 -2.20676526 -1.76712013

H -5.70033447 -1.37106819 0.18523901

C 1.39036304 0.21065493 -0.42904203

C 2.62916714 0.77313497 -0.82236606

C 1.36550504 -0.86498016 0.48094104

C 3.82226523 0.25398993 -0.31453202

C 2.54089513 -1.38055319 0.98623207

H 0.40737297 -1.27689119 0.78183406

C 3.77136822 -0.81378815 0.58201904

H 4.76478630 0.69574596 -0.62360605

H 2.54864313 -2.20459126 1.69034913

O 2.68708114 1.80757705 -1.68393413

H 1.77144007 2.04892707 -1.91956914

H -2.11238523 -1.36690619 -2.21657517

O 4.89130731 -1.36531419 1.11567808

H 5.68250639 -0.91045616 0.79543706

C -2.25079723 1.39731702 1.50057611

N -1.75552020 2.17683208 2.21351317

Trans-ABOHNO2

28

Coordinates

N 0.53230104 0.11262601 -0.24883602

N -0.39681203 -0.66521205 0.10730801

C 1.82547514 -0.44407203 -0.17692801

C 2.93502422 0.39822803 0.03555300

C 2.08250016 -1.79642414 -0.46144404

C 4.24385633 -0.07516001 -0.03324700

C 3.38666026 -2.28236018 -0.50877504

C 4.47201234 -1.42463311 -0.29613302

H 5.06104239 0.61728505 0.13104001

H 3.55927427 -3.33161425 -0.72909905

H 5.48847942 -1.80162914 -0.34016503

C -1.70016013 -0.19875002 -0.03464200

C -2.69613321 -1.09655608 0.42621303

C -2.08954416 1.04451208 -0.57838604

C -4.04792431 -0.76174506 0.32983103

C -3.42474026 1.38211310 -0.67392605

H -1.31563510 1.72533213 -0.91446007

C -4.40294934 0.47133804 -0.21860202

H -4.79486436 -1.46388911 0.68818305

H -3.74463229 2.33165218 -1.08787208

O -2.35733518 -2.28752517 0.96629907

H -1.38235311 -2.33049318 0.96486308

H 1.23892810 -2.44359119 -0.67327505

O -5.69995246 0.86262407 -0.34178003

H -6.29378348 0.17995201 -0.00065400

N 2.74652621 1.81340814 0.38412103

O 1.79286614 2.10818516 1.10225709

O 3.57754427 2.61575320 -0.05100200

Cis - ABOHNO2

28

Coordinates

N -0.77161809 -1.18335004 1.13994915

N 0.47035200 -1.30821603 1.05136614

C -1.51633316 -0.03154096 0.76915212

C -2.53522724 -0.06216897 -0.20209596

C -1.44579117 1.10237913 1.60156318

C -3.44030332 0.99282910 -0.35360697

C -2.33353124 2.16094420 1.44204817

C -3.33645132 2.11225319 0.46375909

H -4.20453338 0.91362109 -1.11735703

H -2.24924324 3.02766927 2.09093622

H -4.03019338 2.93750425 0.34407809

C 1.37374306 -0.46996496 0.38459509

C 2.72284017 -0.83332898 0.66196411

C 1.13374304 0.56006211 -0.55295498

C 3.78454025 -0.15156492 0.06513806

C 2.18225911 1.22693317 -1.15880503

H 0.12070596 0.82430712 -0.82301500

C 3.50910621 0.87533216 -0.83707200

H 4.80217533 -0.44520693 0.30488408

H 2.00787909 2.01096423 -1.88672808

O 2.99609720 -1.84056806 1.51180118

H 2.13085514 -2.22066009 1.77106420

H -0.69169611 1.12583514 2.38148724

O 4.49226429 1.57937522 -1.45885705

H 5.36296636 1.25552920 -1.19013703

N -2.65014224 -1.20308606 -1.11253503

O -1.66981316 -1.94160510 -1.22877704

O -3.71612632 -1.35470008 -1.71526507

TS - ABOHNO2

28

Coordinates

N 0.63102117 -0.10355099 0.83502615

N -0.50926092 -0.13679200 1.29595618

C 1.76602725 -0.53530703 0.33493511

C 2.81281534 0.34029904 -0.09367693

C 2.01445127 -1.94905513 0.23547210

C 4.03306843 -0.16255800 -0.57533396

C 3.22165837 -2.40677517 -0.24470194

C 4.24909144 -1.52425610 -0.65390297

H 4.78454249 0.55604506 -0.88019699

H 3.38090038 -3.48008025 -0.30428894

H 5.19092051 -1.91156213 -1.02530600

C -1.61878400 -0.09134699 0.44200512

C -2.86536910 -0.08340499 1.11706117

C -1.58492200 -0.04353699 -0.96688199

C -4.05397819 -0.05865299 0.38538411

C -2.75709009 -0.01642499 -1.69363905

H -0.62352593 -0.01670799 -1.46933503

C -3.99342419 -0.02706099 -1.00867599

H -5.00136026 -0.05668699 0.91592315

H -2.75753609 0.02415902 -2.77679013

O -2.93088110 -0.10444099 2.46264127

H -2.01696303 -0.09677899 2.80429230

H 1.23548322 -2.63295719 0.55290012

O -5.10915927 0.00126302 -1.78126805

H -5.90574235 0.00742402 -1.23269501

N 2.59023232 1.74673615 -0.04373992

O 1.47600423 2.13380818 0.37157811

O 3.48754438 2.52072921 -0.41088495
